# Supplementary material for: Mineralocorticoid Receptor Antagonists Mitigate Mitral Regurgitation-Induced Myocardial Dysfunction
Source: MDPI journal article supplement (doi:10.3390/cells11172750), 2022-09-03
Supplement: s1 [file s1]

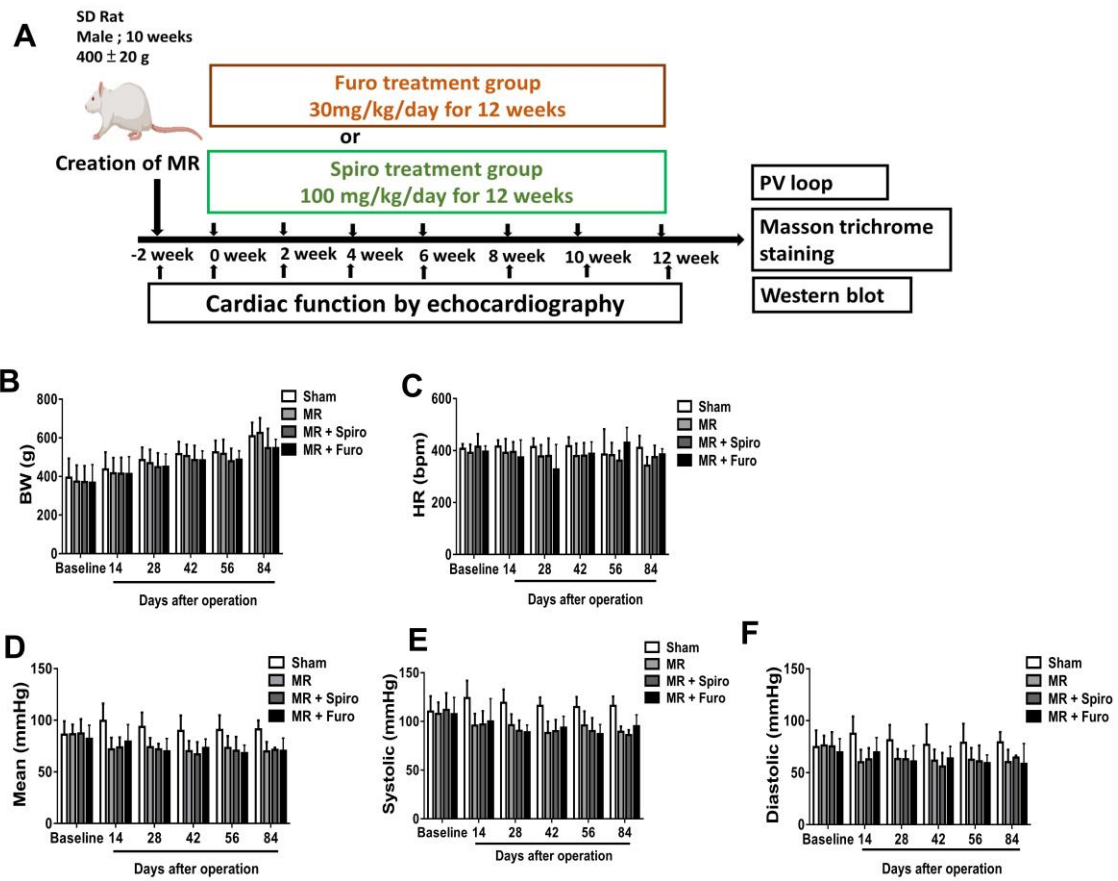

**Figure S1.** Study design of mineralocorticoid receptor antagonists on cardiac remodeling in a rat model of mitral regurgitation (MR).
